# Supplementary material
Source: PubMed Central journal article supplement (PMC2807294)
Supplement: supp_M109.039255_Supplemental_materials.pdf [file supp_M109.039255_Supplemental_materials.pdf]

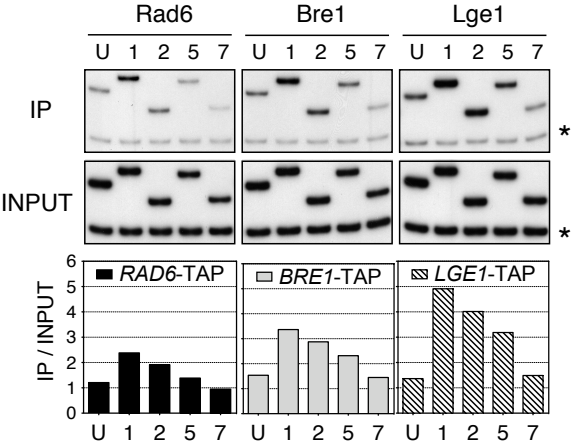

**Supplemental Fig. S1.** The occupancies of Rad6, Bre1 and Lge1 in UAS region of the *PMAI* gene. ChIP analyses were carried out in cells TAP-tagged with Rad6, Bre1, or Lge1 at the indicated region of *PMAI* gene. The quantitated results are graphed at the bottom

Supplemental Table 1. *Saccharomyces cerevisiae* strains used in this study. Individual TAP-tagged and deletion strains were obtained from Open Biosystems or Euroscarf. For gene disruptions, the indicated gene was deleted by high efficiency transformation of a PCR product amplified from genomic DNA containing the target gene of interest, which had been replaced by the *KanMX4* gene (Euroscarf). All deletion strains and genomically tagged strains were confirmed by PCR and/or Western blot analysis.

| Strain | Genotype                                                                                                                                                             | Reference of source |
|--------|----------------------------------------------------------------------------------------------------------------------------------------------------------------------|---------------------|
| BY4741 | <i>MATa, ura3Δ0, leu2Δ0, his3Δ1, met15Δ0</i>                                                                                                                         | -                   |
| YKH045 | <i>MATa ura3-1, leu2-3,112, trp1-1, his3-11,15, ade2-1, htb1-1, htb2-1, pRS314 [Flag-HTB1-CEN-TRP1], pRG145 [GAPDHprom-3HA-UBI4-URA3 Integrative]</i>                | (31)                |
| YKH046 | <i>MATa, ura3-1, leu2-3,112, trp1-1, his3-11,15, ade2-1, htb1-1, htb2-1, pRS314 [Flag-htb1-K123R-CEN-TRP1], pRG145 [GAPDHprom-3HA-UBI4-URA3 Integrative]</i>         | (31)                |
| YKH047 | <i>MATa, ura3-1, leu2-3,112, trp1-1, his3-11,15, ade2-1, htb1-1, htb2-1, ubp8::KanMX4, pRS314 [Flag-HTB1-CEN-TRP1], pRG145 [GAPDHprom-3HA-UBI4-URA3 Integrative]</i> | (31)                |
| YKL142 | <i>MATa, ura3-1, leu2-3,112, trp1-1, his3-11,15, ade2-1, htb1-1, htb2-1, sgf11::LEU2, pRS314 [Flag-HTB1-CEN-TRP1], pRG145 [GAPDHprom-3HA-UBI4-URA3 Integrative]</i>  | (31)                |
| YKL143 | <i>MATa, ura3-1 leu2-3,112, trp1-1, his3-11,15, ade2-1, htb1-1, htb2-1, gcn5::LEU2 pRS314 [Flag-HTB1-CEN-TRP1], pRG145 [GAPDHprom-3HA-UBI4-URA3 Integrative]</i>     | (31)                |
| SY082  | <i>MATa, ura3-1, leu2-3,112, trp1-1, his3-11,15, ade2-1, htb1-1, htb2-1, rad6::KanMX4, pRS314 [Flag-HTB1-CEN-TRP1], pRG145 [GAPDHprom-3HA-UBI4-URA3 Integrative]</i> | This study          |
| SY083  | <i>MATa, ura3-1, leu2-3,112, trp1-1, his3-11,15, ade2-1, htb1-1, htb2-1, bre1::KanMX4, pRS314 [Flag-HTB1-CEN-TRP1], pRG145 [GAPDHprom-3HA-UBI4-URA3 Integrative]</i> | This study          |
| SY084  | <i>MATa, ura3-1, leu2-3,112, trp1-1, his3-11,15, ade2-1, htb1-1, htb2-1, lge1::KanMX4, pRS314 [Flag-HTB1-CEN-TRP1], pRG145 [GAPDHprom-3HA-UBI4-URA3 Integrative]</i> | This study          |
| FY067  | <i>MATa, ura3Δ0, leu2Δ0, his3Δ1, met15Δ0, RAD6-TAP tag::HIS3MX6</i>                                                                                                  | Open Biosystems     |
| FY068  | <i>MATa, ura3Δ0, leu2Δ0, his3Δ1, met15Δ0, BRE1-TAP tag::HIS3MX6</i>                                                                                                  | Open Biosystems     |

|       |                                                                                     |                 |
|-------|-------------------------------------------------------------------------------------|-----------------|
| FY089 | <i>MATa, ura3Δ0, leu2Δ0, his3Δ1, met15Δ0, UBP8-TAP tag::HIS3MX6</i>                 | Open Biosystems |
| FY168 | <i>MATa, ura3Δ0, leu2Δ0, his3Δ1, met15Δ0, LGE1-TAP tag::HIS3MX6</i>                 | Open Biosystems |
| FY090 | <i>MATa, ura3Δ0, leu2Δ0, his3Δ1, met15Δ0, SGF11-TAP tag::HIS3MX6</i>                | Open Biosystems |
| SY197 | <i>MATa, ura3Δ0, leu2Δ0, his3Δ1, met15Δ0, RAD6-TAP tag::HIS3MX6, lge1Δ::KanMX4</i>  | This study      |
| SY198 | <i>MATa, ura3Δ0, leu2Δ0, his3Δ1, met15Δ0, BRE1-TAP tag::HIS3MX6, lge1Δ::KanMX4</i>  | This study      |
| SY199 | <i>MATa, ura3Δ0, leu2Δ0, his3Δ1, met15Δ0, UBP8-TAP tag::HIS3MX6, lge1Δ::KanMX4</i>  | This study      |
| FY280 | <i>MATa, ura3Δ0, leu2Δ0, his3Δ1, met15Δ0, GCN5-TAP tag::HIS3MX6</i>                 | Open Biosystems |
| FY281 | <i>MATa, ura3Δ0, leu2Δ0, his3Δ1, met15Δ0, TAF6-TAP tag::HIS3MX6</i>                 | Open Biosystems |
| FY282 | <i>MATa, ura3Δ0, leu2Δ0, his3Δ1, met15Δ0, SPT8-TAP tag::HIS3MX6</i>                 | Open Biosystems |
| SY275 | <i>MATa, ura3Δ0, leu2Δ0, his3Δ1, met15Δ0, SGF11-TAP tag::HIS3MX6, lge1Δ::KanMX4</i> | This study      |
| SY276 | <i>MATa, ura3Δ0, leu2Δ0, his3Δ1, met15Δ0, GCN5-TAP tag::HIS3MX6, lge1Δ::KanMX4</i>  | This study      |
| SY277 | <i>MATa, ura3Δ0, leu2Δ0, his3Δ1, met15Δ0, TAF6-TAP tag::HIS3MX6, lge1Δ::KanMX4</i>  | This study      |
| SY278 | <i>MATa, ura3Δ0, leu2Δ0, his3Δ1, met15Δ0, SPT8-TAP tag::HIS3MX6, lge1Δ::KanMX4</i>  | This study      |

---

Supplemental Table 2. Oligonucleotides used in this study.

| Name<br>(Location, ATG: +1)  | Primer<br>position in<br>Fig. 1A | Sequence                     | Reference<br>or source |
|------------------------------|----------------------------------|------------------------------|------------------------|
| PMA1-UAS-for (-927 ~ -906)   | UAS                              | GAAACGGAGAAACATAAACAGG       | (14, 15)               |
| PMA1-UAS-rev (-697 ~ -678)   | UAS                              | GTCTCGAGGCCTGGAAGTGC         | (14, 15)               |
| PMA1-PRO-for (-371 ~ -348)   | 1                                | GGTACCGCTTATGCTCCCCTCCAT     | (14, 15)               |
| PMA1-PRO-rev (-115 ~ -90)    | 1                                | CTTTTGAATGTGTGTATAAAAGAGAG   | (14, 15)               |
| PMA1-CDS1-for (168 ~ 190)    | 2                                | CGACGACGAAGACAGTGATAACG      | (14, 15)               |
| PMA1-CDS1-rev (349 ~ 376)    | 2                                | ATTGAATTGGACCGACGAAAAACATAAC | (14, 15)               |
| PMA1-CDS2-for (584 ~ 608)    | 3                                | AAGTCGTCCCAGGTGATATTTTGCA    | (14, 15)               |
| PMA1-CDS2-rev (784 ~ 807)    | 3                                | AACGAAAGTGTTGTCACCGGTAGC     | (14, 15)               |
| PMA1-CDS4-for (2018 ~ 2045)  | 5                                | CTATTATTGATGCTTTGAAGACCTCCAG | (14, 15)               |
| PMA1-CDS4-rev (2263 ~ 2290)  | 5                                | TGCCCAAATAATAGACATACCCATAA   | (14, 15)               |
| PMA1-3UTR2-for (3287 ~ 3313) | 7                                | GAAAATATTTGGTATCTTTGCAAGATG  | (14, 15)               |
| PMA1-3UTR2-rev (3474 ~ 3500) | 7                                | GTAAATTTGTATACGTTTCATGTAAGTG | (14, 15)               |
| ADH1-PRO-for (-236 ~ -213)   | 1                                | TTCCTTCCTTCATTCACGCACACT     | (14, 15)               |
| ADH1-PRO-rev (-39 ~ -14)     | 1                                | GTTGATTGTATGCTTGGTATAGCTTG   | (14, 15)               |
| ADH1-CDS-for (844 ~ 871)     | 2                                | TTCAACCAAGTCGTCAAGTCCATCTCTA | (14, 15)               |
| ADH1-CDS-rev (987 ~ 1013)    | 2                                | ATTTGACCCTTTTCCATCTTTTCGTAA  | (14, 15)               |
| ADH1-3UTR-for (1231 ~ 1254)  | 3                                | ACCGGCATGCCGAGCAAATGCCTG     | (14, 15)               |
| ADH1-3UTR-rev (1378 ~ 1400)  | 3                                | CCCAACTGAAGGCTAGGCTGTGG      | (14, 15)               |
| GAL10-PRO1-for (-393 ~ -374) | 1                                | TTACTGCCAATTTTCCTCT          | This study             |
| GAL10-PRO1-rev (-151 ~ -133) | 1                                | GAGCCCCATTATCTTAGCC          | This study             |
| GAL10-PRO2-for (-58 ~ -37)   | 2                                | TTAAACTTCTTTGCGTCCATCC       | This study             |
| GAL10-PRO2-rev (161-182)     | 2                                | TGCTTGGTCAAGACCTCTAACC       | This study             |
| GAL10-CDS1-for (401-424)     | 3                                | CTTCTGCTACTGTCTATGGTGATG     | This study             |
| GAL10-CDS1-rev (667-687)     | 3                                | CTTCTCGCGCCTACCAACAGC        | This study             |

|                            |   |                            |            |
|----------------------------|---|----------------------------|------------|
| GAL10-CDS2-for (823-844)   | 4 | TGTCGTGAGTGGAACCTTGGGTT    | This study |
| GAL10-CDS2-rev (1084-1108) | 4 | GCATATCTTCAGCGGAAAATCTGGC  | This study |
| GAL10-CDS3-for (1869-1892) | 5 | TGTCAAGGCTTTTCATCCCGATTC   | This study |
| GAL10-CDS3-rev (2057-2078) | 5 | TTGGACCCGTAAGTTTCACCGT     | This study |
| *ChrV NO-ORF-for           | - | GGCTGTCAGAATATGGGGCCGTAGTA | (14, 15)   |
| *ChrV NO-ORF-rev           | - | CACCCCGAAGCTGCTTTCACAATAC  | (14, 15)   |

\*These primers were used for the amplification of a non-transcribed region of chromosome V.
